# Supplementary material for: Yield Components and Development in Indeterminate Tomato Landraces: An Agromorphological Approach to Promoting Their Utilization
Source: MDPI journal article supplement (doi:10.3390/agronomy13020434), 2023-01-31
Supplement: s1 [file s1]

Archive with 4 entries (4 files):
- Supplementary Table S1.pdf
- Supplementary Table S2.xlsx
- Supplementary Table S3.pdf
- Supplementary Table S4.pdf
