# Supplementary material for: Yield Components and Development in Indeterminate Tomato Landraces: An Agromorphological Approach to Promoting Their Utilization
Source: MDPI journal article supplement (doi:10.3390/agronomy13020434), 2023-01-31
Supplement: s1 [file s1 › Supplementary Table S1.pdf]

**Table S1.** Soil and climate characteristics of the evaluation site, 2016-2017.

| Variable                          | La Platina Experimental<br>Station* |
|-----------------------------------|-------------------------------------|
| <b>Temperature</b>                | Average                             |
|                                   | minimal/ maximum (°C)               |
| September                         | 4.8 / 23.5                          |
| October                           | 7.6 / 23.8                          |
| November                          | 9.4 / 28.9                          |
| December                          | 11.3 / 29.1                         |
| January                           | 13.9 / 33.4                         |
| February                          | 12.7 / 30.8                         |
| March                             | 10.1 / 27.9                         |
| <b>Mean relative humidity</b>     | (%)                                 |
| September                         | 60.3                                |
| October                           | 61.6                                |
| November                          | 55.8                                |
| December                          | 60.2                                |
| January                           | 49.7                                |
| February                          | 56.8                                |
| March                             | 57.9                                |
| <b>Soil</b>                       |                                     |
| Soil type                         | Mollisol                            |
| Soil origin                       | Alluvial                            |
| pH H <sub>2</sub> O 1:1 (0-65 cm) | 7.9                                 |
| Soil texture                      | Clay-sandy                          |
| Organic matter (0-40 cm) %        | 2.2                                 |

Weather conditions during the growth season were obtained from INIA La Platina weather station, Santiago, Chile (33°34'20.20" S, 70°37'31.22" O, 620 m.a.s.l). [www.agrometeorologia.cl](http://www.agrometeorologia.cl), accessed on 5 of January 2023.
