# Supplementary material for: Yield Components and Development in Indeterminate Tomato Landraces: An Agromorphological Approach to Promoting Their Utilization
Source: MDPI journal article supplement (doi:10.3390/agronomy13020434), 2023-01-31
Supplement: s1 [file s1 › Supplementary Table S2.xlsx]

## Sheet: Table S2
Supplementary Table 2. Yield, yield components and phenotypical traits Best Linear Unbiased Prediction (BLUP) for each accesion
		SLY121	SLY122	SLY123	SLY124	SLY129	SLY147	SLY148	SLY149	SLY150	SLY151	SLY152	SLY157	SLY159	SLY30	SLY39	SLY47	SLY49	SLY50	SLY65	SLY66	SLY70	SLY74	SLY82	SLY83
Yield and yield components		3709	3349	3452	2825	3429	3978	2786	3918	3287	3309	2243	3401	3308	3783	3334	3199	2361	3312	3182	3131	3180	3392	3307	3466
Total fresh yield (Y)	grams per m-2	3717	3358	3460	2834	3438	3986	2794	3927	3295	3318	2251	3410	3316	3792	3342	3208	2369	3321	3191	3140	3188	3401	3316	3475
Average fresh fruit weight (FFW)	grams per fruit	81.2	87.9	135.4	92.5	71	76.6	73.4	83.9	77.3	77.1	66.9	132.8	124.6	72.1	87.3	86.7	29.2	63	105.1	71.8	84.7	80.5	102.2	81.8
Total number of fruits (NFM)	plant fruits per m-2	44.8	36	26.5	30.2	45.8	51.6	33.1	46.9	39.9	41	29.1	26.1	24.6	50.6	36.9	33.1	49.1	45.3	30.8	39.6	34.7	41.8	36.2	40.3
Number of clusters (CLU)	clusters per plant per m-2	12.6	12.6	12.4	12.7	14.1	13.2	11.7	14	12.2	12	9.5	11.7	12.1	16.27	13.1	14.4	15.5	15	14	14.5	15.6	12.7	13.8	14
Number of fruits per cluster (FRU)	fruits per cluster	3.3	3	2.6	2.8	3.1	3.4	3	3.2	3.2	3.2	3.1	2.7	2.6	3.1	3	2.8	3.2	3.1	2.7	2.8	2.7	3.2	2.8	3
Phenotypical traits
Anther length (AL)	mm	8.1	8.4	8.9	8.4	9.1	8	8.2	8.4	8	8.2	10.4	9.4	10	9.3	9.5	9.3	9.3	8.2	9	9.1	9.5	8.3	9.7	9.4
Petal length (PL)	mm	10.6	11.3	12	10.7	11.3	10.3	10.3	10.5	10.5	9.7	14.5	12.6	13.6	12.2	12.8	12.1	12.1	10.4	12.4	11.9	12.5	10.6	14	12.2
Ovary length (OL)	mm	1.5	1.5	1.7	1.6	1.6	1.5	1.5	1.5	1.5	1.5	1.7	1.6	1.7	1.6	1.6	1.6	1.6	1.6	1.6	1.6	1.7	1.6	1.7	1.7
Ovary diameter (OD)	mm	2.4	2.4	2.4	2.4	2.6	2.4	2.5	2.4	2.5	2.6	2.7	2.6	2.7	2.3	2.7	2.6	2.3	2.5	2.5	2.4	2.5	2.4	2.4	2.6
Stigma exertion (STE)	mm	0	-0.2	0.1	0.3	-1.4	-0.1	-0.4	-0.9	-0.3	-0.5	-1.8	1	0.5	0.9	0.5	1.1	0.4	1	1.3	0.8	0.8	-0.8	-0.3	-1.4
Number of petals (NP)	number	8	8	8	8	9	8	8.3	8.3	8.5	8.4	8.1	8.4	8.6	7.85	8.5	8.2	7.6	8.7	8.3	7.6	8.2	8.4	7.5	8.7
Number of flowers (NFL)	number	10	11.6	11	10.3	12	11.5	10.1	11.4	10	9.7	11.6	11.1	10.3	11.3	11	10.7	11.1	11.7	10.3	11.3	11.6	10.1	11	10.8
Number of set flowers (NSF)	number	6.4	6.5	6.6	7.2	7	7.9	6.5	7.6	6.4	6.6	6.9	5.7	4.5	7.6	6.5	6.1	6.5	7.1	5.8	6	6.6	6.6	7	7.2
Number of locules (NLC)	number	10.2	10.2	9	10.9	10.8	10.3	10.8	9.8	10.4	9.7	9.7	11.2	12.4	8.4	9.3	10.5	7.3	9.8	9.7	8.5	9.5	10.1	6.9	10.1
Stem diameter (SD)	mm	9.2	9.7	9.5	8.7	9.3	9.4	8.7	9.1	9.3	9	9.6	10.1	11	10.3	9.8	9.9	9.7	9.7	9.8	10.5	9.9	8.9	10.6	9.9
Cluster phenology (CGDD)	day degrees per cluster	97.7	96.2	96.1	103.1	89.7	93.3	97.3	92	94.8	98.9	112.9	100.4	99.2	81.9	95.3	89.75	81.3	86.7	89	81.6	84	98.8	95.5	89.9
Fruit weight (WG)	grams	108	115	127	95	100	107	100	103	99	87	96	145	152	98	106	119	49	86	131	104	111	107	111	110
