# Supplementary material for: Yield Components and Development in Indeterminate Tomato Landraces: An Agromorphological Approach to Promoting Their Utilization
Source: MDPI journal article supplement (doi:10.3390/agronomy13020434), 2023-01-31
Supplement: s1 [file s1 › Supplementary Table S3.pdf]

Table S3. Correlation among phenological and morphological traits. N=365

|                             | WG    |     | AL    |     | PL    |     | OL    |     | OD    |     | STE   |    | NP    |     | NFL   |     | NSF   |    | NLC   |     | SD    |     |
|-----------------------------|-------|-----|-------|-----|-------|-----|-------|-----|-------|-----|-------|----|-------|-----|-------|-----|-------|----|-------|-----|-------|-----|
| <i>Genetic (n=24)</i>       |       |     |       |     |       |     |       |     |       |     |       |    |       |     |       |     |       |    |       |     |       |     |
| Anther length (AL)          | 0.28  | ns  | -     |     |       |     |       |     |       |     |       |    |       |     |       |     |       |    |       |     |       |     |
| Petal length (PL)           | 0.43  | *   | 0.94  | *** | -     |     |       |     |       |     |       |    |       |     |       |     |       |    |       |     |       |     |
| Ovary length (OL)           | -0.39 | ns  | -0.81 | *** | -0.75 | *** | -     |     |       |     |       |    |       |     |       |     |       |    |       |     |       |     |
| Ovary diameter (OD)         | -0.12 | ns  | -0.36 | ns  | -0.26 | ns  | 0.33  | ns  | -     |     |       |    |       |     |       |     |       |    |       |     |       |     |
| Stigma exertion (STE)       | 0.30  | ns  | 0.16  | ns  | 0.27  | ns  | -0.06 | ns  | 0.06  | ns  | -     |    |       |     |       |     |       |    |       |     |       |     |
| Number of petals (NP)       | 0.08  | ns  | -0.04 | ns  | -0.12 | ns  | -0.11 | ns  | -0.72 | *** | -0.12 | ns | -     |     |       |     |       |    |       |     |       |     |
| Number of flowers (NFL)     | -0.08 | ns  | 0.26  | ns  | 0.18  | ns  | -0.20 | ns  | 0.04  | ns  | 0.04  | ns | -0.11 | ns  | -     |     |       |    |       |     |       |     |
| Number of set flowers (NSF) | -0.46 | *   | -0.13 | ns  | -0.27 | ns  | 0.06  | ns  | 0.27  | ns  | -0.44 | *  | -0.10 | ns  | 0.33  | ns  | -     |    |       |     |       |     |
| Number of locules (NLC)     | 0.22  | ns  | -0.28 | ns  | -0.29 | ns  | 0.23  | ns  | -0.38 | ns  | -0.06 | ns | 0.48  | *   | -0.21 | ns  | -0.20 | ns | -     |     |       |     |
| Stem diameter (SD)          | 0.45  | *   | 0.72  | *** | 0.73  | *** | -0.55 | **  | -0.15 | ns  | 0.51  | *  | -0.05 | ns  | 0.26  | ns  | -0.30 | ns | -0.30 | ns  | -     |     |
| Cluster phenology (CDD)     | -0.14 | ns  | 0.03  | ns  | 0.00  | ns  | -0.13 | ns  | 0.16  | ns  | 0.36  | ns | -0.10 | ns  | 0.40  | ns  | 0.07  | ns | -0.47 | *   | 0.36  | ns  |
| <i>Phenotypic (n=365)</i>   |       |     |       |     |       |     |       |     |       |     |       |    |       |     |       |     |       |    |       |     |       |     |
| Anther length (AL)          | 0.19  | *** | -     |     |       |     |       |     |       |     |       |    |       |     |       |     |       |    |       |     |       |     |
| Petal length (PL)           | 0.22  | *** | 0.78  | *** | -     |     |       |     |       |     |       |    |       |     |       |     |       |    |       |     |       |     |
| Ovary length (OL)           | 0.12  | *   | 0.51  | *** | 0.53  | *** | -     |     |       |     |       |    |       |     |       |     |       |    |       |     |       |     |
| Ovary diameter (OD)         | 0.22  | *** | 0.21  | *** | 0.25  | *** | 0.32  | *** | -     |     |       |    |       |     |       |     |       |    |       |     |       |     |
| Stigma exertion (STE)       | 0.10  | ns  | -0.06 | ns  | 0.02  | ns  | 0.07  | ns  | 0.02  | ns  | -     |    |       |     |       |     |       |    |       |     |       |     |
| Number of petals (NP)       | 0.14  | **  | -0.09 | ns  | -0.06 | ns  | 0.08  | ns  | 0.68  | *** | 0.01  | ns | -     |     |       |     |       |    |       |     |       |     |
| Number of flowers (NFL)     | -0.06 | ns  | 0.01  | ns  | 0.00  | ns  | 0.04  | ns  | 0.02  | ns  | 0.04  | ns | 0.08  | ns  | -     |     |       |    |       |     |       |     |
| Number of set flowers (NSF) | -0.18 | *** | -0.13 | *   | -0.10 | *   | -0.10 | ns  | -0.07 | ns  | -0.06 | ns | 0.05  | ns  | 0.73  | *** | -     |    |       |     |       |     |
| Number of locules (NLC)     | 0.51  | *** | -0.14 | **  | -0.15 | **  | -0.10 | *   | 0.31  | *** | 0.03  | ns | 0.37  | *** | 0.02  | ns  | -0.06 | ns | -     |     |       |     |
| Stem diameter (SD)          | 0.19  | *** | 0.39  | *** | 0.38  | *** | 0.20  | *** | 0.12  | *   | 0.13  | ** | -0.03 | ns  | 0.16  | **  | 0.09  | ns | -0.06 | ns  |       |     |
| Cluster phenology (CDD)     | 0.08  | ns  | -0.04 | ns  | 0.00  | ns  | 0.00  | ns  | 0.14  | **  | -0.20 | ** | 0.11  | *   | -0.08 | ns  | -0.10 | *  | 0.22  | *** | -0.34 | *** |

Anther length (AL), petal length (PL), ovary length (OL), style length (STL), ovary maximum diameter (OD), stigma exertion (STE), number of petals (NP), number of flowers (NFL), number or flowers set NSF), fresh weight (WG), number of locules (NLC), mean thermal time to cluster develop (CDD). Level of statistical significance: \*: p-value  $\leq$  0.05; \*\*: p-value  $\leq$  0.01; \*\*\*: p-value  $\leq$  0.001, ns: not significant
