# Supplementary material for: Yield Components and Development in Indeterminate Tomato Landraces: An Agromorphological Approach to Promoting Their Utilization
Source: MDPI journal article supplement (doi:10.3390/agronomy13020434), 2023-01-31
Supplement: s1 [file s1 › Supplementary Table S4.pdf]

Supplementary Table 4. Correlation among yield, yield components and morphological traits

|                             | Y     |     | FFW   |     | NFM   |     | CLU   |     | FRU   |     |
|-----------------------------|-------|-----|-------|-----|-------|-----|-------|-----|-------|-----|
| <i>Genetic n=24</i>         |       |     |       |     |       |     |       |     |       |     |
| Anther length (AL)          | -0.25 | ns  | 0.23  | ns  | -0.41 | *   | 0.13  | ns  | -0.58 | **  |
| Petal length (PL)           | -0.23 | ns  | 0.36  | ns  | -0.49 | *   | 0.06  | ns  | -0.62 | **  |
| Ovary length (OL)           | -0.23 | ns  | 0.26  | ns  | -0.41 | *   | 0.18  | ns  | -0.64 | *** |
| Ovary diameter (OD)         | -0.19 | ns  | 0.07  | ns  | -0.41 | ns  | -0.33 | ns  | -0.23 | ns  |
| Stigma exertion (STE)       | -0.14 | ns  | 0.29  | ns  | -0.24 | ns  | 0.37  | ns  | -0.53 | **  |
| Number of petals (NP)       | 0.19  | ns  | 0     | ns  | -0.02 | ns  | -0.19 | ns  | 0.01  | ns  |
| Number of flowers (NFL)     | 0.12  | ns  | -0.27 | ns  | 0.19  | ns  | 0.41  | *   | -0.03 | ns  |
| Number of set flowers (NSF) | 0.38  | ns  | -0.3  | ns  | 0.51  | *   | 0.25  | ns  | 0.37  | ns  |
| Number of locules (NLC)     | 0.08  | ns  | 0.21  | ns  | -0.28 | ns  | -0.45 | *   | -0.06 | ns  |
| Stem diameter (SD)          | -0.03 | ns  | 0.22  | ns  | -0.21 | ns  | 0.34  | ns  | -0.54 | **  |
| Cluster phenology (CGDD)    | -0.02 | ns  | 0.38  | ns  | -0.52 | **  | -0.9  | *** | -0.06 | ns  |
| Fruit weight (WG)           | 0.23  | ns  | 0.79  | *** | -0.54 | **  | -0.15 | ns  | -0.62 | **  |
| <i>Phenotypic=365</i>       |       |     |       |     |       |     |       |     |       |     |
| Anther length (AL)          | -0.02 | ns  | 0.17  | **  | -0.16 | **  | 0.04  | ns  | -0.19 | *** |
| Petal length (PL)           | 0.01  | ns  | 0.23  | *** | -0.18 | *** | 0.02  | ns  | -0.2  | *** |
| Ovary length (OL)           | -0.04 | ns  | 0.14  | *** | -0.15 | **  | 0.01  | ns  | -0.19 | *** |
| Ovary diameter (OD)         | 0.01  | ns  | 0.26  | *** | -0.24 | *** | -0.11 | *   | -0.17 | *** |
| Stigma exertion (STE)       | -0.03 | ns  | 0.1   | *   | -0.07 | ns  | 0.21  | *** | -0.29 | *** |
| Number of petals (NP)       | 0.09  | ns  | 0.18  | *** | -0.09 | ns  | -0.09 | ns  | -0.02 | ns  |
| Number of flowers (NFL)     | 0.14  | **  | -0.06 | ns  | 0.18  | *** | 0.1   | *   | 0.11  | *   |
| Number of set flowers (NSF) | 0.21  | *** | -0.17 | *** | 0.35  | *** | 0.14  | **  | 0.27  | *** |
| Number of locules (NLC)     | 0.07  | ns  | 0.32  | *** | -0.2  | *** | -0.21 | *** | -0.08 | ns  |
| Stem diameter (SD)          | 0.43  | *** | 0.16  | **  | 0.27  | *** | 0.32  | *** | 0.03  | ns  |
| Cluster phenology (CGDD)    | -0.33 | *** | 0.2   | *** | -0.53 | *** | -0.9  | *** | 0.1   | ns  |
| Fruit weight (WG)           | 0.31  | *** | 0.71  | *** | -0.3  | *** | -0.08 | ns  | -0.3  | *** |

Significance of the correlation \*:  $p$ -value  $\leq 0.05$ ; \*\*:  $p$ -value  $\leq 0.01$ ; \*\*\*:  $p$ -value  $\leq 0.001$ , ns: not significant
